# Supplementary material
Source: Research Square preprint supplement (doi:10.21203/rs.3.rs-9103123/v1)
Supplement: Supplementary file 1 [file c51d6f26c162bef1b13dd46a.xlsx]

## Sheet: ITS_Dataset
Year	t	djp_tax_real2015_billion	djbc_tax_real2015_billion	pnbp_real2015_billion	tax_total_real2015_billion	domestic_rev_real2015_billion	total_rev_real2015_billion	pulse2020	covid_step_2020_2021	vat11_exposure	pps_exposure	post2020	time_after_2020	post2022	time_after_2022	ln_djp_tax_real2015_billion	ln_pnbp_real2015_billion	Inflasi_YoY_avg_pct	CPI_2015_100	Deflator	GDP_USD_billion_current	GDPpc_USD_const2015	gdp_idr_billion_real2015_fxJan2026	gdp_pc_idr_const2015_fx2015avg	fx_usd_idr_avg2015	fx_usd_idr_jan2026	ln_gdp_pc_idr_const2015_fx2015avg	ln_gdp_idr_billion_real2015_fxJan2026	gdp_idr_trillion_real2015_fxJan2026
2015	0	1.06084e+06	179581	255628	1.24042e+06	1.49605e+06	1.50802e+06	0	0	0	0	0	0	0	0	13.8746	12.4515	6.3825	100	1	860.85	3290	1.44502e+07	4.42754e+07	13457.6	16786	17.6059	16.4862	14450.2
2016	1	1.06826e+06	172891	253042	1.24115e+06	1.49419e+06	1.50287e+06	0	0	0	0	0	0	0	0	13.8815	12.4413	3.53083	103.531	1.03531	931.88	3420	1.51091e+07	46024935	13457.6	16786	17.6447	16.5308	15109.1
2017	2	1.07098e+06	179114	289572	1.25009e+06	1.53966e+06	1.55048e+06	0	0	0	0	0	0	0	0	13.8841	12.5762	3.80917	107.474	1.07474	1020	3550	1.5931e+07	4.77744e+07	13457.6	16786	17.682	16.5838	15931
2018	3	1.18412e+06	185257	369053	1.36938e+06	1.73843e+06	1.75246e+06	0	0	0	0	0	0	0	0	13.9845	12.8187	3.1975	110.911	1.10911	1040	3700	1.574e+07	4.97931e+07	13457.6	16786	17.7234	16.5717	15740
2019	4	1.16624e+06	186816	357917	1.35305e+06	1.71097e+06	1.71578e+06	0	0	0	0	0	0	0	0	13.9693	12.7881	3.02917	114.271	1.14271	1120	3850	1.64524e+07	5.18117e+07	13457.6	16786	17.7631	16.616	16452.4
2020	5	919497	182707	294874	1.1022e+06	1.39708e+06	1.41323e+06	1	1	0	0	1	0	0	0	13.7316	12.5943	2.03583	116.597	1.16597	1060	3740	1.52604e+07	5.03314e+07	13457.6	16786	17.7341	16.5408	15260.4
2021	6	1.07978e+06	227345	387189	1.30712e+06	1.69431e+06	1.69854e+06	0	1	0	0	1	1	0	0	13.8923	12.8667	1.56	118.416	1.18416	1190	3850	1.68688e+07	5.18117e+07	13457.6	16786	17.7631	16.641	16868.8
2022	7	1.39127e+06	257527	482668	1.6488e+06	2.13146e+06	2.13608e+06	0	0	0.75	0.5	1	2	1	0	14.1457	13.0871	4.20583	123.396	1.23396	1320	4020	1.79564e+07	54099485	13457.6	16786	17.8063	16.7035	17956.4
2023	8	1.4599e+06	223801	478752	1.6837e+06	2.16246e+06	2.17589e+06	0	0	1	0	1	3	1	1	14.1939	13.0789	3.68583	127.945	1.27945	1370	4190	1.79741e+07	5.63873e+07	13457.6	16786	17.8478	16.7044	17974.1
2024	9	1.51949e+06	245226	375886	1.76471e+06	2.1406e+06	2.14093e+06	0	0	1	0	1	4	1	2	14.2339	12.837	2.30333	130.891	1.30891	1400	4370	1.79541e+07	5.88096e+07	13457.6	16786	17.8898	16.7033	17954.1
2025	10	1.55697e+06	232663	357756	1.78964e+06	2.14739e+06	2.14814e+06	0	0	1	0	1	5	1	3	14.2583	12.7876	1.9125	133.395	1.33395	1430	4480	1.79947e+07	6.029e+07	13457.6	16786	17.9147	16.7056	17994.7

## Sheet: Data_Dictionary
Variable	Description
Year	Calendar year
t	Time index (2015=0)
djp_tax_real2015_billion	DJP-managed tax components (PPh+PPN&PPnBM+PBB+Pajak Lainnya) deflated to 2015 prices; unit: billion IDR
djbc_tax_real2015_billion	DJBC-managed tax components (Bea Masuk+Pajak Ekspor+Cukai) deflated to 2015 prices; unit: billion IDR
pnbp_real2015_billion	Non-tax revenue (PNBP) deflated to 2015 prices; unit: billion IDR
tax_total_real2015_billion	Total tax revenue (BPS) deflated to 2015 prices; unit: billion IDR
domestic_rev_real2015_billion	Total domestic revenue (BPS) deflated to 2015 prices; unit: billion IDR
total_rev_real2015_billion	Total state revenue (BPS) deflated to 2015 prices; unit: billion IDR
pulse2020	Pulse dummy for 2020 only
covid_step_2020_2021	Step dummy for 2020–2021 period
vat11_exposure	Exposure for VAT 11%: 0 pre-2022; 0.75 in 2022 (Apr–Dec); 1 in 2023+
pps_exposure	Exposure for PPS: 0.5 in 2022 (Jan–Jun); 0 otherwise
post2020	Indicator for Year>=2020
time_after_2020	Years since 2020 (0 before 2020)
post2022	Indicator for Year>=2022
time_after_2022	Years since 2022 (0 before 2022)
ln_djp_tax_real2015_billion	Natural log of djp_tax_real2015_billion
ln_pnbp_real2015_billion	Natural log of pnbp_real2015_billion
Inflasi_YoY_avg_pct	Annual average YoY inflation (percent), computed from monthly BI inflation series
CPI_2015_100	Constructed CPI index (2015=100), compounded using annual inflation
Deflator	Deflator = CPI_2015_100 / 100
GDP_USD_billion_current	GDP in current USD (billions) from provided GDP file
GDPpc_USD_const2015	GDP per capita in constant 2015 USD from provided GDP file
gdp_idr_billion_real2015_fxJan2026	GDP (current USD, billions) converted to IDR using Jan-2026 USD/IDR then deflated to constant 2015 IDR; alternative scaling, unit: billion IDR
gdp_pc_idr_const2015_fx2015avg	GDP per capita (constant 2015 USD) converted to constant 2015 IDR using average 2015 USD/IDR; no additional deflation, unit: IDR/person
fx_usd_idr_avg2015	Average USD/IDR exchange rate for 2015 used as fixed FX (IDR per USD)
fx_usd_idr_jan2026	USD/IDR exchange rate for January 2026 used in legacy conversion (IDR per USD)
ln_gdp_pc_idr_const2015_fx2015avg	Natural log of gdp_pc_idr_const2015_fx2015avg
ln_gdp_idr_billion_real2015_fxJan2026	Natural log of gdp_idr_billion_real2015_fxJan2026
gdp_idr_trillion_real2015_fxJan2026	GDP constant 2015 IDR (from gdp_idr_billion_real2015_fxJan2026), unit: trillion IDR
